# Supplementary material for: The oncoprotein HBXIP promotes glucose metabolism reprogramming via downregulating SCO2 and PDHA1 in breast cancer
Source: PubMed Central journal article supplement (PMC4694983; doi:10.18632/oncotarget.4508), 2015-07-30
Supplement: oncotarget-06-27199-s001.pdf [file oncotarget-06-27199-s001.pdf]

SUPPLEMENTARY FIGURES AND TABLE

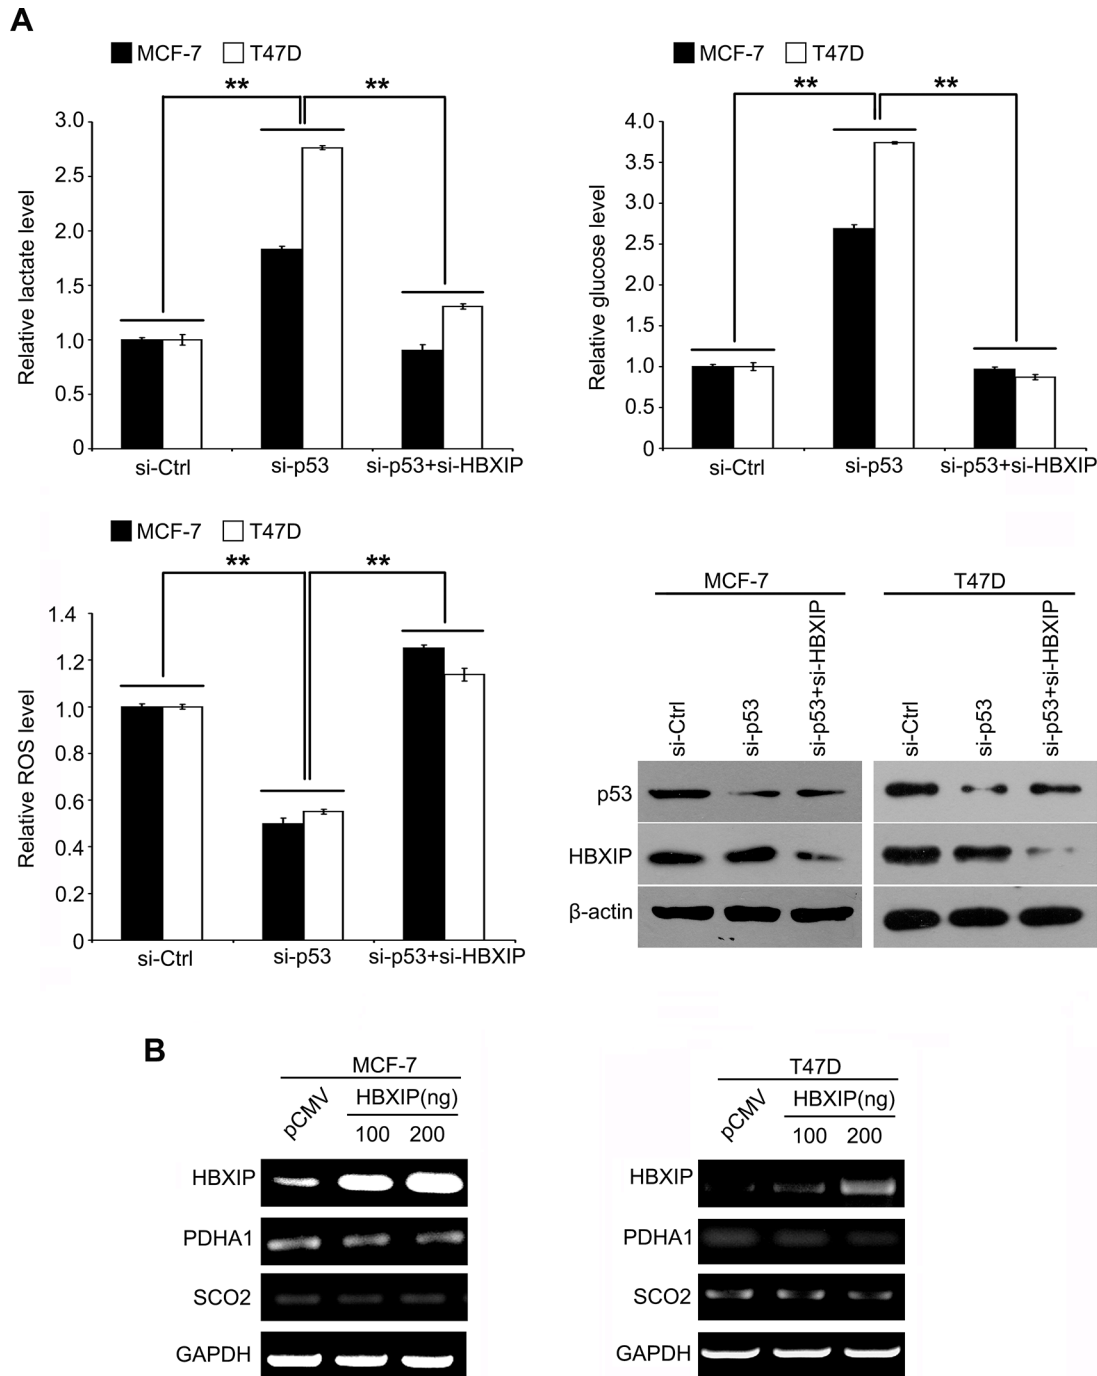

**Supplementary Figure 1: HBXIP downregulates the expression of SCO2 and PDHA1 in breast cancer cells.** **A.** The levels of lactate, intracellular glucose and ROS were measured by HPLC, glucose-lactate biosense tester SBA-40E and flow cytometer analysis in MCF-7 and T47D cells transfected with si-p53 or si-p53/si-HBXIP. The interference efficiency of si-p53 and si-HBXIP was confirmed by Western blot analysis. **B.** The mRNA levels of HBXIP, SCO2 and PDHA1 were examined by RT-PCR analysis in MCF-7 and T47D cells transfected with HBXIP. Statistically significant differences are indicated: \*\* $P < 0.01$ , Student's  $t$ -test. Each experiment was repeated at least three times. Data are shown as mean  $\pm$  SEM ( $n = 3$ ).



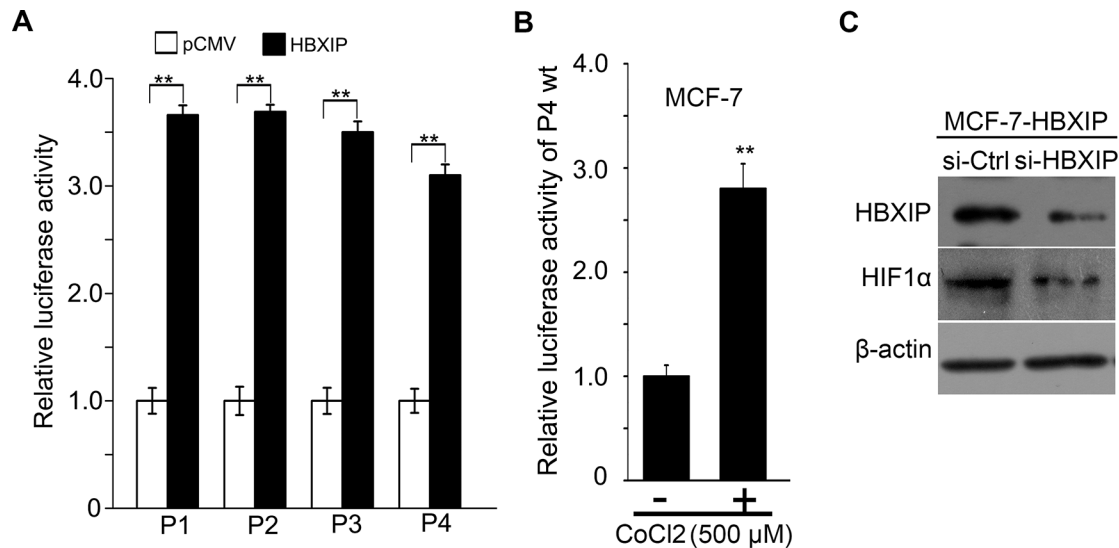

**Supplementary Figure 3: HBXIP activates miR-183/96/182 promoter through transcriptional factor HIF1α.** **A.** The promoter activities of miR-183/96/182 cluster were analyzed by luciferase reporter gene assays in MCF-7 cells transfected with HBXIP. **B.** The effect of CoCl<sub>2</sub> (500 μM), a chemical inducer of HIF1α, on the promoter activity of P4 fragment of miR-183/96/182 was detected by luciferase reporter gene assays in MCF-7 cells. **C.** The protein levels of HIF1α and HBXIP were detected by Western blot analysis in MCF-7-HBXIP cells transfected with si-HBXIP. Statistically significant differences are indicated: \*\* $P < 0.01$ , Student's *t*-test. Each experiment was repeated at least three times. Data are shown as mean ± SEM ( $n = 3$ ).

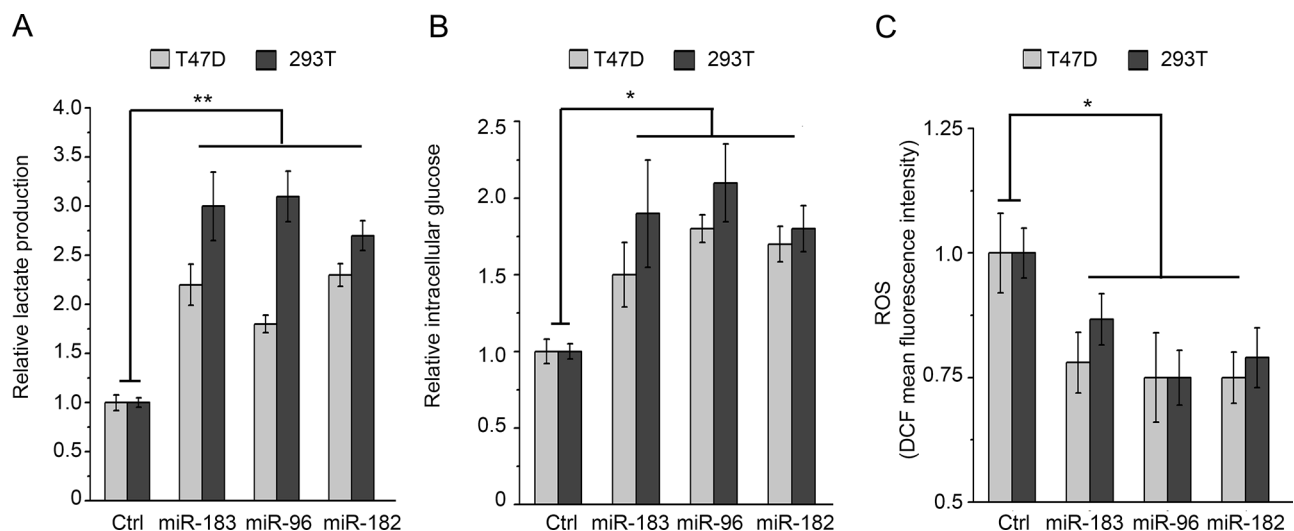

**Supplementary Figure 4: HBXIP enhances the glucose metabolism reprogramming of breast cancer cells through miR-183/96/182 in vitro.** **A.** The levels of lactate in the culture media of T47D and 293T cells transfected with miR-183/96/182 were measured by HPLC and normalized to cell number. **B.** The levels of intracellular glucose were detected by glucose-lactate biosense tester SBA-40E and normalized based on the protein concentration in T47D and 293T cells transfected with miR-183/96/182. **C.** The levels of intracellular ROS were assessed by flow cytometry in T47D and 293T cells transfected with miR-183/96/182. Statistically significant differences are indicated: \* $P < 0.05$ , \*\* $P < 0.01$ , Student's *t*-test. Each experiment was repeated at least three times. Data are shown as mean ± SEM ( $n = 3$ ).

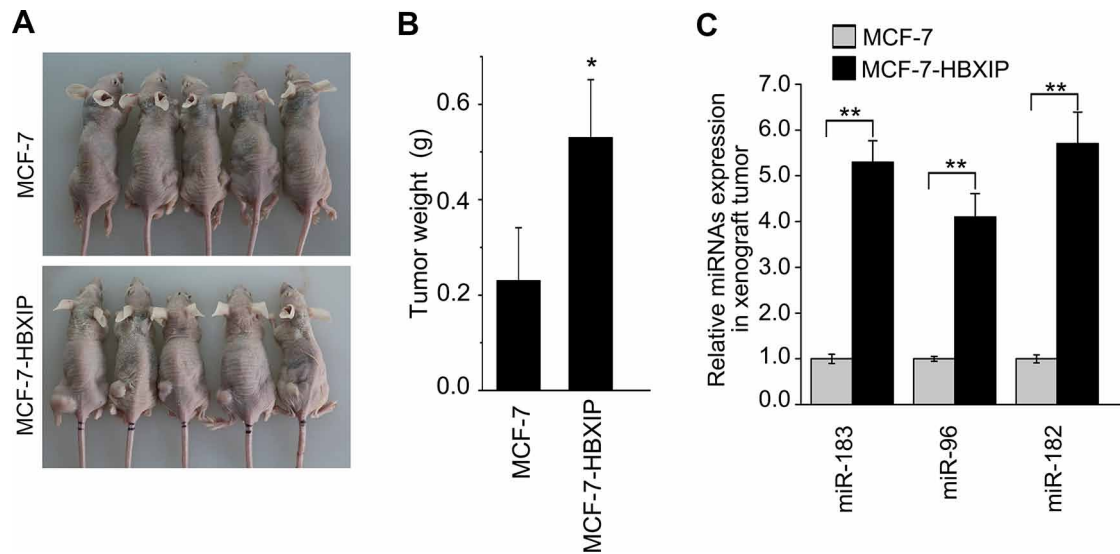

**Supplementary Figure 5: HBXIP enhances the growth of breast cancer cells through miR-183/96/182 targeting SCO2 and PDHA1 *in vivo*.** **A.** Photographs of MCF-7 cells and MCF-7-HBXIP cells-injected nude mice with tumors were shown. **B.** The average weight of tumors from above mice was shown. **C.** The relative expression levels of miR-183, miR-96 and miR-182 were detected by qRT-PCR analysis in the xenograft tumor tissues derived from MCF-7 and MCF-7-HBXIP cells. Statistically significant differences are indicated: \* $P < 0.05$ , \*\* $P < 0.01$ , Student's *t*-test. Each experiment was repeated at least three times. Data are shown as mean  $\pm$  SEM ( $n = 3$ ).

**Supplementary Table 1: List of primers used in this paper**

| Gene                                       | Primer  | Sequence (5'-3')                                  |
|--------------------------------------------|---------|---------------------------------------------------|
| <b>Primers for miR-183/96/182 promoter</b> |         |                                                   |
| P1                                         | forward | CTTGTATCCCGGGCACCTTT                              |
|                                            | reverse | TGCTTGGAATCCGACCCCTG                              |
| P2                                         | forward | CTTGTATCCCGGGCACCTTT                              |
|                                            | reverse | TTCAATATGCCCGACTCCCG                              |
| P3                                         | forward | GGTTCTCGACAGCAGGTGAA                              |
|                                            | reverse | TGCTTGGAATCCGACCCCTG                              |
| P4                                         | forward | GGTTCTCGACAGCAGGTGAA                              |
|                                            | reverse | TTCAATATGCCCGACTCCCG                              |
| P5                                         | forward | CTTGTATCCCGGGCACCTTT                              |
|                                            | reverse | TTCACCTGCTGTCGAGAACC                              |
| P6                                         | forward | CGGGAGTCGGGCATATTGAA                              |
|                                            | reverse | TGCTTGGAATCCGACCCCTG                              |
| P4-hif1 $\alpha$ -mut                      | forward | GGCCCGTTGGGCTCTGTGACTCATTATCTCCGCTGTCCGGTTCTCGCT  |
|                                            | reverse | AGCGAGAACCCGGACAGCGGAGATAATGAGTCACAGAGCCCAACGGGCC |
| <b>miRNAs qRT-PCR primers</b>              |         |                                                   |
| miR-183                                    | forward | TATGGCACTGGTAGAATTCACCT                           |
| miR-96                                     | forward | TTTGGCACTAGCACATTTTGTCT                           |
| miR-182                                    | forward | TTTGGCAATGGTAGAATTCACCT                           |
|                                            | reverse | TAGCAGCGGGAACAGTTCTGCAG                           |

(Continued)

| Gene                                  | Primer  | Sequence (5'-3')                                  |
|---------------------------------------|---------|---------------------------------------------------|
| <b>Primers for RT-PCR and qRT-PCR</b> |         |                                                   |
| PDHA1                                 | forward | AGACCATCTCATCACAGCCTAC                            |
|                                       | reverse | TCTCAACAGACGTTCCCAT                               |
| SCO2                                  | forward | TGGGTGCTGATGTACTTTGGC                             |
|                                       | reverse | ACAGTCTTGGGTGGAAGTCCTG'                           |
| GAPDH                                 | forward | CATCACCATCTTCCAGGAGCG                             |
|                                       | reverse | TGACCTTGCCACAGCCTTG                               |
| HBXIP                                 | forward | ATGGAGCCAGGTGCAGGTC                               |
|                                       | reverse | TGGAGGGATTCTTCATTGTG                              |
| <b>Primers for CDS cloning</b>        |         |                                                   |
| SCO2                                  | forward | ATGCTGCTGCTGACTCGGAGCC                            |
|                                       | reverse | TCAAGACAGGACACTGCGGAAA                            |
| PDHA1                                 | forward | ATGAGGAAGATGCTCGCCG                               |
|                                       | reverse | TAACTGACTGACTTAAACTTG                             |
| HIF1 $\alpha$                         | forward | CGGGGTACCATGGAGGGCGCCGGCGGC                       |
|                                       | reverse | CGCGGATCCTCAGTTAACTTGATCCAAAGCTCTG                |
| HIF1(P564A)                           | forward | ATTTAGACTTGGAGATGTTAGCTGCCTATATCCCAATGGATGATGACTT |
|                                       | reverse | AAGTCATCATCCATTGGGATATAGGCAGCTAACATCTCCAAGTCTAAAT |
| <b>Primers for ChIP</b>               |         |                                                   |
|                                       | forward | ATGGGTCTGAGGACCAGGTAGG                            |
|                                       | reverse | CCCAGGTGGATAACTGGACGA                             |
| <b>Primers for pLuc-SCO2-96p-182</b>  |         |                                                   |
|                                       | forward | TCAGCTCAAGCCTCGGGTCC                              |
|                                       | reverse | TCCAGCCCCGAACAGGC                                 |
| <b>Primers for pLuc-SCO2-663p-183</b> |         |                                                   |
|                                       | forward | TGACATCTGCCAGACGAGC                               |
|                                       | reverse | GACAGGACACTGCGGAAAGC                              |
| <b>Primers for pLuc-PDHA1-419p-96</b> |         |                                                   |
|                                       | forward | ACAGACCATCTCATCACAGCCTAC                          |
|                                       | reverse | TAGCAGCACCATCGCCATAT                              |
| Si-HBXIP                              |         | GCAGCUAAGCUAACCUCUGdTdT                           |
| Si-p53                                |         | GUGCAGCUGUGGGUUGAUUUU                             |
